# Supplementary material
Source: ML conference proceedings conference paper supplement (https://openaccess.thecvf.com/content/CVPR2026/html/Jiang_VGA-Bench_A_Unified_CVPR_2026_paper.html)
Supplement: Supplementary file 1 [file Jiang_VGA-Bench_A_Unified_CVPR_2026_supplemental.pdf]

# VGA-Bench: A Unified Benchmark and Multi-Model Framework for Video Aesthetics and Generation Quality Evaluation

## Supplementary Material

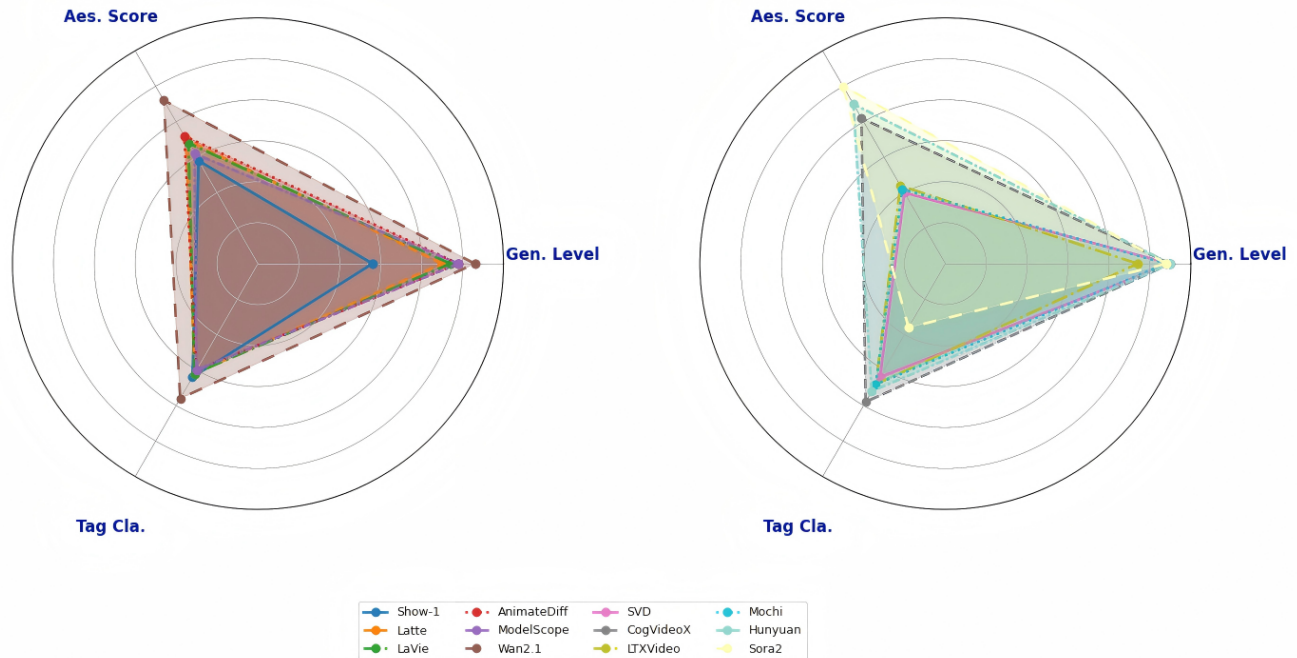

Figure 1. Radar chart comparing the performance of various video generation models across three evaluation dimensions. The concentric circular grids represent score levels, ranging from 0.1 at the center to 0.9 outward in 0.1 intervals. Higher values indicate better performance. Each model is represented by a closed polygon with distinct colors and line styles for easy comparison.

### 1. Dimension of Generation Quality

The meanings of the dimensions of generation quality are summarized in Table 3.

### 2. Overview of Generative Model Performance

The performance comparison of various generative models across the three core dimensions is shown in Figure 1.

### 3. Comprehensive Evaluation Results of Generative Models across Sub-Dimensions in VGA-Bench

#### 3.1. Performance Comparison of Generative Models on Aesthetic Quality Dimensions

Table 1 presents the scoring results of 12 mainstream generative models across sub-attributes under the aesthetic quality dimension. All scores are generated by VAQA-Net through automated evaluation, reflecting the visual appeal

and artistic expressiveness of the videos produced by these models.

#### 3.2. Comparison of Aesthetic Tag Prediction Capabilities

Table 2 reports aesthetic tag prediction accuracies using VTag-Net, evaluating the models' capabilities in understanding and generating complex aesthetic semantics.

#### 3.3. Performance Comparison of Generative Models on the Generation Quality Dimension

Due to the extensive sub-dimensions within generation quality, we conduct automated annotations using VGQA-Net and present the performance comparisons across three separate tables: Table 4 details 11 metrics on video-text consistency and spatio-temporal alignment; Table 5 assesses 14 realism metrics concerning physical laws and real-world commonsense; and Table 6 evaluates 6 technical dimensions reflecting basic low-level visual fidelity.

Table 1. Performance Comparison of Generative Models on Aesthetic Quality Dimensions

| Model            | Overall      | Com          | SS           | Lig          | VT           | Col          | DoF          | Exp          | Cos          | Mak          |
|------------------|--------------|--------------|--------------|--------------|--------------|--------------|--------------|--------------|--------------|--------------|
| Show-1 [? ]      | 0.290        | 0.415        | 0.383        | 0.367        | 0.357        | 0.397        | 0.330        | 0.294        | 0.317        | 0.294        |
| Latte-1 [? ]     | 0.345        | 0.472        | 0.435        | 0.420        | 0.410        | 0.445        | 0.393        | 0.313        | 0.340        | 0.296        |
| LaVie [? ]       | 0.341        | 0.468        | 0.435        | 0.421        | 0.407        | 0.442        | 0.396        | 0.309        | 0.340        | 0.293        |
| AnimateDiff [? ] | 0.356        | 0.475        | 0.446        | 0.427        | 0.415        | 0.460        | 0.400        | 0.317        | 0.364        | 0.310        |
| ModelScope [? ]  | 0.312        | 0.445        | 0.413        | 0.397        | 0.381        | 0.430        | 0.377        | 0.287        | 0.334        | 0.266        |
| Wan2.1 [? ]      | <u>0.459</u> | <u>0.552</u> | <u>0.523</u> | <u>0.523</u> | <u>0.521</u> | <u>0.521</u> | <u>0.503</u> | 0.436        | 0.459        | 0.412        |
| SVD [? ]         | 0.204        | 0.305        | 0.260        | 0.229        | 0.233        | 0.277        | 0.191        | 0.207        | 0.151        | 0.164        |
| CogVideoX [? ]   | 0.405        | 0.480        | 0.454        | 0.437        | 0.431        | 0.453        | 0.399        | 0.389        | 0.420        | 0.354        |
| LTXVideo [? ]    | 0.214        | 0.313        | 0.275        | 0.238        | 0.241        | 0.285        | 0.208        | 0.189        | 0.142        | 0.125        |
| Mochi [? ]       | 0.211        | 0.306        | 0.269        | 0.240        | 0.234        | 0.283        | 0.203        | 0.198        | 0.147        | 0.147        |
| Hunyuan [? ]     | 0.452        | 0.531        | 0.505        | 0.507        | 0.504        | 0.512        | 0.485        | <u>0.455</u> | <u>0.465</u> | <u>0.430</u> |
| Sora2 [? ]       | <b>0.504</b> | <b>0.559</b> | <b>0.532</b> | <b>0.543</b> | <b>0.564</b> | <b>0.560</b> | <b>0.540</b> | <b>0.520</b> | <b>0.532</b> | <b>0.452</b> |

Table 2. Comparison of Aesthetic Tag Prediction Capabilities

| Model           | CT          | NoLS        | LSP         | LQ          | LC          | ST          | DoF         | Sat         | Bri         | Col         | Con         |
|-----------------|-------------|-------------|-------------|-------------|-------------|-------------|-------------|-------------|-------------|-------------|-------------|
| Show-1[? ]      | 0.17        | 0.47        | 0.19        | 0.46        | 0.17        | 0.32        | 0.54        | <u>0.29</u> | 0.42        | 0.48        | 0.35        |
| Latte-1[? ]     | 0.16        | 0.47        | 0.19        | 0.46        | 0.12        | 0.25        | 0.60        | <u>0.29</u> | 0.35        | 0.46        | 0.35        |
| LaVie[? ]       | 0.17        | 0.47        | 0.19        | 0.46        | 0.11        | 0.25        | <u>0.66</u> | <u>0.29</u> | 0.41        | 0.39        | 0.35        |
| AnimateDiff[? ] | <u>0.18</u> | 0.47        | 0.19        | 0.46        | 0.06        | 0.23        | <u>0.66</u> | <u>0.29</u> | 0.37        | 0.39        | 0.35        |
| ModelScope[? ]  | 0.17        | 0.47        | 0.19        | 0.46        | 0.01        | 0.23        | 0.60        | <u>0.29</u> | 0.43        | 0.40        | 0.35        |
| Wan2.1[? ]      | <u>0.18</u> | 0.60        | 0.19        | <b>0.57</b> | 0.23        | 0.34        | <b>0.68</b> | <b>0.38</b> | <u>0.47</u> | 0.58        | <u>0.36</u> |
| SVD[? ]         | <b>0.19</b> | 0.50        | <u>0.24</u> | 0.46        | 0.28        | 0.22        | 0.52        | <u>0.29</u> | 0.25        | 0.46        | <b>0.37</b> |
| CogVideoX[? ]   | <u>0.18</u> | <b>0.71</b> | 0.19        | <u>0.51</u> | 0.33        | <u>0.38</u> | 0.62        | <u>0.29</u> | <b>0.48</b> | 0.63        | <b>0.37</b> |
| LTXVideo[? ]    | 0.15        | 0.52        | <b>0.27</b> | <u>0.46</u> | <u>0.36</u> | 0.20        | 0.57        | <u>0.29</u> | 0.25        | <u>0.64</u> | <u>0.36</u> |
| Mochi[? ]       | 0.17        | 0.49        | <u>0.24</u> | 0.46        | <b>0.44</b> | 0.20        | 0.55        | <u>0.29</u> | 0.25        | <b>0.69</b> | 0.35        |
| Hunyuan[? ]     | 0.16        | <u>0.66</u> | 0.21        | 0.48        | 0.23        | <b>0.40</b> | <b>0.68</b> | 0.27        | 0.45        | 0.47        | 0.35        |
| Sora2[? ]       | 0.13        | 0.32        | 0.14        | 0.29        | 0.19        | 0.32        | 0.27        | 0.11        | 0.15        | 0.19        | 0.10        |

Table 3. Number and explanation of different assessment dimensions

| Type                   | Num. | Assessment Dimension                             | Description                                                                                                                                                                               |
|------------------------|------|--------------------------------------------------|-------------------------------------------------------------------------------------------------------------------------------------------------------------------------------------------|
| Video-Text Consistency | 1    | Character-Text Consistency                       | Whether specific characters in the video match the text description (e.g., Elon Musk should appear as the correct individual).                                                            |
|                        | 2    | Action-Text Consistency                          | Whether actions in the video match the text description (e.g., running, jumping), focusing solely on the action regardless of the subject.                                                |
|                        | 3    | Scene-Text Consistency                           | Whether scenes in the video match the described settings (e.g., hospital, school), including identifiable scene elements.                                                                 |
|                        | 4    | Object Position-Text Consistency                 | Object positions refer to relative placement based on camera orientation (e.g., if “a motorcycle is to the left of a bus,” they should appear on corresponding sides of the video frame). |
|                        | 5    | Object Attribute-Text Consistency                | Object attributes include descriptive features like color, shape, and texture.                                                                                                            |
|                        | 6    | Object-Text Consistency                          | Whether objects in the video can be correctly identified as those mentioned in the text.                                                                                                  |
|                        | 7    | Video Content-Text Consistency                   | Overall alignment where every textual description should be accurately generated.                                                                                                         |
|                        | 8    | Video Speed-Text Consistency                     | Whether video speed matches textual descriptions (current samples only include slow-motion).                                                                                              |
|                        | 9    | Video Style-Text Consistency                     | Whether artistic styles mentioned in text (e.g., Van Gogh, Picasso) are recognizable in the video.                                                                                        |
|                        | 10   | Camera Movement-Text Consistency                 | Whether camera movements described in text (e.g., pan left, tilt right) are properly executed.                                                                                            |
|                        | 11   | Unrealistic Description Imaginative Presentation | When text describes unrealistic scenarios (e.g., “an astronaut riding a horse in space”), whether the video presentation aligns with imaginative expectations.                            |
| Realism & Plausibility | 12   | Rigid Body Collision Realism                     | Whether rigid body collisions in videos appear physically plausible.                                                                                                                      |
|                        | 13   | Action Realism                                   | Whether actions could realistically be performed.                                                                                                                                         |
|                        | 14   | Scene Realism                                    | Whether scenes appear sufficiently realistic when no special style is specified in text.                                                                                                  |
|                        | 15   | Weather Representation Realism                   | Whether weather conditions appear realistic.                                                                                                                                              |
|                        | 16   | Time Period Representation Realism               | Whether time-period representations appear authentic.                                                                                                                                     |
|                        | 17   | Gaseous Motion Realism                           | Whether gas dynamics (smoke, vapor) appear physically accurate.                                                                                                                           |
|                        | 18   | Fluid Motion Realism                             | Whether fluid movements appear physically plausible.                                                                                                                                      |
|                        | 19   | Gradual Change Motion Realism                    | Whether gradual transformations (balloon inflation, plant growth) appear physically accurate.                                                                                             |
|                        | 20   | Object Motion Trajectory Realism                 | Whether object movement paths follow physically plausible dynamics.                                                                                                                       |
|                        | 21   | Object Realism                                   | Whether objects appear sufficiently realistic.                                                                                                                                            |
|                        | 22   | Character Generation Quality                     | Whether human characters appear sufficiently realistic.                                                                                                                                   |
|                        | 23   | Textual Attribute Representation Realism         | Whether object attributes (color, shape, texture) match real-world appearances.                                                                                                           |
|                        | 24   | Video Lighting and sGQAow Realism                | Whether lighting and sGQAows appear physically accurate.                                                                                                                                  |
|                        | 25   | Moving Scene Reasonableness                      | Whether scene transitions during camera movements maintain proper perspective.                                                                                                            |
|                        | 26   | Overall Realism                                  | Whether the entire video looks realistic overall.                                                                                                                                         |
| Basic Quality          | 27   | Abnormal Lighting Detection                      | Videos should avoid lighting artifacts (overexposure, abnormal flares).                                                                                                                   |
|                        | 28   | Video Noise-Free                                 | Videos should exhibit no noticeable noise artifacts.                                                                                                                                      |
|                        | 29   | Video Clarity                                    | Whether video resolution is sufficiently sharp.                                                                                                                                           |
|                        | 30   | Static Content Non-distortion                    | Stationary objects shouldn’t distort abnormally during camera movement.                                                                                                                   |
|                        | 31   | Static Content Stability                         | Stationary objects shouldn’t distort abnormally over time (temporal consistency).                                                                                                         |

Table 4. Evaluation Results on Video-Text Consistency

| Model           | 1            | 2            | 3            | 4            | 5            | 6            | 7            | 8            | 9            | 10           | 11           |
|-----------------|--------------|--------------|--------------|--------------|--------------|--------------|--------------|--------------|--------------|--------------|--------------|
| Show-1[? ]      | 0.037        | 0.364        | 0.362        | 0.346        | 0.505        | 0.466        | 0.196        | 0.027        | 0.030        | 0.433        | 0.250        |
| Latte-1[? ]     | 0.052        | 0.285        | 0.770        | 0.565        | 0.875        | 0.672        | 0.598        | 0.000        | 0.034        | 0.500        | 0.288        |
| LaVie[? ]       | <b>0.076</b> | 0.212        | 0.852        | 0.512        | 0.887        | 0.682        | 0.598        | 0.007        | 0.064        | 0.612        | 0.340        |
| AnimateDiff[? ] | 0.024        | 0.168        | 0.783        | 0.500        | <b>0.977</b> | 0.770        | 0.547        | 0.000        | 0.014        | <b>0.861</b> | 0.400        |
| ModelScope[? ]  | 0.021        | 0.208        | 0.754        | 0.464        | 0.964        | 0.816        | 0.567        | 0.014        | 0.037        | <u>0.806</u> | <b>0.480</b> |
| Wan2.1[? ]      | 0.026        | 0.840        | 0.672        | <u>0.629</u> | 0.900        | 0.795        | <u>0.628</u> | <b>0.295</b> | <b>0.184</b> | 0.595        | <u>0.448</u> |
| SVD[? ]         | <u>0.066</u> | <b>0.958</b> | <b>0.893</b> | <u>0.572</u> | 0.934        | <b>0.917</b> | <u>0.591</u> | 0.071        | 0.050        | 0.655        | 0.410        |
| CogVideoX[? ]   | 0.055        | <u>0.936</u> | <u>0.863</u> | 0.512        | 0.929        | <u>0.888</u> | 0.599        | 0.045        | 0.065        | 0.720        | 0.419        |
| LTXVideo[? ]    | 0.032        | 0.561        | 0.578        | 0.542        | 0.781        | 0.640        | 0.538        | 0.038        | 0.043        | 0.533        | 0.303        |
| Mochi[? ]       | 0.039        | 0.897        | 0.803        | <b>0.701</b> | 0.951        | 0.813        | <b>0.679</b> | 0.039        | 0.043        | 0.632        | 0.387        |
| Hunyuan[? ]     | 0.056        | 0.856        | 0.799        | 0.592        | <u>0.970</u> | 0.809        | 0.600        | 0.034        | 0.041        | 0.620        | 0.350        |
| Sora2[? ]       | 0.024        | 0.842        | 0.790        | 0.532        | 0.934        | 0.851        | 0.603        | <u>0.086</u> | <u>0.094</u> | 0.715        | 0.425        |

Table 5. Evaluation Results on Realism &amp; Plausibility

| Model           | 12           | 13           | 14           | 15           | 16           | 17           | 18           | 19           | 20           | 21           | 22           | 23           | 24           | 25           | 26           |
|-----------------|--------------|--------------|--------------|--------------|--------------|--------------|--------------|--------------|--------------|--------------|--------------|--------------|--------------|--------------|--------------|
| Show-1[? ]      | 0.028        | 0.267        | 0.294        | 0.377        | 0.206        | 0.344        | 0.377        | 0.609        | 0.127        | 0.351        | 0.237        | 0.389        | 0.284        | 0.282        | 0.227        |
| Latte-1[? ]     | 0.038        | 0.435        | 0.511        | 0.640        | 0.388        | 0.350        | 0.488        | 0.825        | 0.150        | 0.428        | 0.513        | 0.600        | 0.413        | 0.463        | 0.598        |
| LaVie[? ]       | 0.035        | 0.402        | 0.529        | 0.618        | 0.345        | 0.415        | 0.490        | 0.830        | 0.145        | 0.408        | 0.530        | 0.607        | 0.440        | 0.533        | 0.598        |
| AnimateDiff[? ] | 0.025        | 0.490        | 0.535        | 0.644        | 0.415        | 0.390        | 0.500        | 0.760        | 0.145        | 0.466        | 0.611        | 0.677        | 0.485        | 0.556        | 0.547        |
| ModelScope[? ]  | 0.070        | 0.484        | 0.522        | 0.676        | 0.405        | 0.375        | 0.490        | 0.870        | 0.180        | 0.508        | 0.574        | 0.660        | <u>0.490</u> | 0.574        | 0.567        |
| Wan2.1[? ]      | <b>0.163</b> | 0.517        | 0.521        | 0.539        | <b>0.481</b> | 0.575        | 0.500        | <b>0.938</b> | <b>0.210</b> | 0.527        | 0.521        | 0.572        | <b>0.494</b> | 0.533        | 0.628        |
| SVD[? ]         | 0.025        | 0.496        | <b>0.586</b> | 0.672        | 0.445        | <b>0.655</b> | 0.500        | 0.660        | 0.165        | <u>0.605</u> | 0.652        | 0.640        | 0.440        | <b>0.671</b> | 0.591        |
| CogVideoX[? ]   | 0.030        | 0.512        | 0.551        | <u>0.677</u> | 0.461        | <u>0.597</u> | 0.470        | 0.875        | 0.139        | 0.590        | 0.631        | 0.602        | 0.420        | 0.641        | 0.599        |
| LTXVideo[? ]    | 0.035        | 0.465        | 0.520        | 0.605        | 0.391        | 0.471        | 0.444        | 0.864        | 0.131        | 0.497        | 0.520        | 0.595        | 0.424        | 0.509        | 0.623        |
| Mochi[? ]       | 0.047        | 0.506        | 0.540        | 0.665        | 0.415        | 0.500        | <b>0.560</b> | <u>0.937</u> | 0.174        | 0.535        | <u>0.653</u> | 0.631        | 0.466        | 0.578        | <b>0.786</b> |
| Hunyuan[? ]     | 0.035        | 0.526        | <u>0.563</u> | <b>0.784</b> | 0.428        | <b>0.526</b> | <u>0.547</u> | 0.864        | 0.172        | 0.593        | <b>0.714</b> | <b>0.700</b> | 0.438        | 0.616        | <u>0.694</u> |
| Sora2[? ]       | 0.085        | <u>0.520</u> | 0.553        | 0.660        | <u>0.450</u> | 0.585        | 0.490        | 0.780        | <u>0.190</u> | <b>0.620</b> | 0.604        | <u>0.694</u> | 0.450        | <u>0.668</u> | 0.603        |

Table 6. Evaluation Results on Basic Visual Quality

| Model           | 27           | 28           | 29           | 30           | 31           |
|-----------------|--------------|--------------|--------------|--------------|--------------|
| Show-1[? ]      | 0.369        | 0.097        | 0.212        | 0.257        | 0.285        |
| Latte-1[? ]     | 0.766        | 0.158        | 0.365        | 0.447        | 0.742        |
| LaVie[? ]       | 0.861        | 0.207        | 0.452        | 0.500        | 0.717        |
| AnimateDiff[? ] | 0.843        | 0.214        | 0.526        | <u>0.525</u> | 0.680        |
| ModelScope[? ]  | 0.633        | 0.232        | 0.454        | 0.482        | 0.664        |
| SVD[? ]         | <u>0.898</u> | <u>0.292</u> | <b>0.650</b> | 0.511        | 0.733        |
| CogVideoX[? ]   | 0.855        | <b>0.304</b> | <u>0.592</u> | 0.515        | 0.748        |
| LTXVideo[? ]    | 0.823        | 0.238        | 0.476        | 0.518        | <b>0.808</b> |
| Mochi[? ]       | 0.824        | 0.223        | 0.500        | 0.511        | <u>0.805</u> |
| Hunyuan[? ]     | 0.876        | 0.253        | 0.556        | <b>0.578</b> | 0.797        |
| Sora2[? ]       | <b>0.906</b> | 0.215        | 0.540        | 0.518        | 0.720        |
